# Supplementary material for: Reformulation of an extant ATPase active site to mimic ancestral GTPase activity reveals a nucleotide base requirement for function
Source: eLife. 2021 Mar 11;10:e65845. doi: 10.7554/eLife.65845 (PMC7952092; doi:10.7554/eLife.65845)
Supplement: Figure 2—source data 1. [file elife-65845-fig2-data1.xlsx]

## Sheet: NSxR SxE (wt)
ATP (mM)
0	0.0113636	0.0142045	0.000473485	0.00300687	0.00859107	0.0133162	0.0120275	0.012457	0.0111684	-0.246914	-0.297419	-0.274972	-0.0277778	-0.0166667	0.0111111	0.0833333	0.104938	0.141975	0.0802469	0.0123457
0.125	0.327178	0.384943	0.392045	0.359966	0.368557	0.356959	0.355241	0.353522	0.350515	0.679012	0.858586	0.729517	0.488889	0.661111	0.544444	0.527778	0.0246914	0.0802469	0.228395	0.104938
0.25	0.599905	0.59375	0.606534	0.58677	0.592784	0.54811	0.543385	0.555842	0.551117	1.2009	1.14478	1.23457	0.811111	0.85	0.872222	0.894444	-0.0185185	0.475309	0.135802	0.0987654
0.5	0.879735	0.861269	0.84375	0.897766	0.910223	0.874141	0.85567	0.84579	0.860825	1.89113	1.64422	1.76207	1.31667	1.27778	1.28889	1.58333	0.302469	0.259259	0.166667	0.185185
1	1.05398	0.991951	1.08475	1.02234	0.907646	1.12156	1.05799	1.08806	1.01246	2.25589	2.03143	2.13244	1.58889	1.62778	1.84444	1.75556	0.537037	0.58642	0.641975	0.623457
2	1.24337	1.2339	1.20833	1.39175	1.36297	1.33806	1.28179	1.30971	1.30928	2.32772	2.95062	2.28283	1.93889	2.04444	2.15556	2.13333	0.820988	0.888889	1.02469	0.888889
4	1.08617	1.30682	1.27841	1.47938	1.53265	1.46134	1.4549	1.53479	1.39991	1.11672	2.18294	2.38496	2.58889	2.57778	2.97778	3.21667	0.802469	1	0.882716	0.87037
GTP (mM)
0	0.0210526	0.0149123	0.0149123	0.0301047	0.0274869	0.0213787	0.0149457	0.0144928	0.0181159	-0.0841751	0.0729517	0.140292	0.0555556	0.00555556	-0.00555556	-0.0555556	0.161111	0.116667	0.188889	0.15	0.05	0.1	0.0555556	-0.0388889
0.125	0.0719298	0.0587719	0.0600877	0.0619546	0.0584642	0.069808	0.0765399	0.0783514	0.0905797	0.123457	0.0505051	0.493827	0.222222	0.0777778	0.161111	0.15	0.0555556	0.0222222	0.1	-0.0222222	0.0222222	0.211111	0.138889	0.161111
0.25	0.135088	0.163158	0.152632	0.155759	0.156632	0.124346	0.122283	0.173007	0.158514	0.23569	0.297419	1.05499	0.355556	0.377778	0.394444	0.244444	0.0833333	-0.0166667	0.0944444	0.0944444	0.238889	0.155556	0.122222	0.1
0.5	0.232895	0.238158	0.231579	0.28185	0.277487	0.267452	0.293478	0.299366	0.240942	0.409652	0.594837	0.645342	0.372222	0.422222	0.616667	0.522222	0.238889	0.111111	0.155556	0.183333	0.277778	0.166667	0.155556	0.161111
1	0.410526	0.416228	0.393421	0.393543	0.286213	0.47993	0.455616	0.473732	0.488678	0.931538	0.948373	1.22334					0.266667	0.15	0.0166667	0.316667	0.366667	0.366667	0.461111	0.361111
2	0.486404	0.555263	0.545175	0.613874	0.614747	0.598604	0.622736	0.634511	0.652174	1.1055	1.84624	1.37486	1.6	1.41667	1.98889	2.05556	0.311111	0.45	0.405556	0.433333	0.938889	0.861111	0.855556	0.905556
4	0.547807	0.705702	0.579386	0.780541	0.750436	0.777923	0.688859	0.710598	0.67029	1.48373	1.28395	1.06397	1.15	1.14444	1.06667	0.944444	0.283333	0.4	0.338889	0.338889	0.894444	0.961111	0.916667	0.766667

## Sheet: NSxD SxE
ATP (mM)
0	0.0203252	-0.00121951	0.0126016	-0.00420875	-0.00294613	0.000841751	0.0210481	0.00300687	-0.00214777	0.111111	0.0333333	-0.0222222	-0.0666667	0.255556	0.177778	0.122222	0.0777778
0.125	0.273171	0.289837	0.260569	0.507576	0.38931	0.373737	0.373282	0.355241	0.379725	0.0388889	0.216667	-0.0555556	0.0333333	0.127778	0.305556	0.0333333	0.122222
0.25	0.480894	0.446341	0.47561	0.602273	0.656987	0.588384	0.593643	0.602234	0.580326	-0.0611111	0.0444444	-0.0611111	0.0333333	0.144444	0.25	0.144444	0.238889
0.5	0.710163	0.730081	0.701626	0.813552	1.0202	1.03325	0.922251	0.947165	0.95189	0.355556	0.172222	0.216667	0.405556	0.438889	0.255556	0.3	0.488889
1	1.04715	0.949187	1.01829	1.20875	1.22348	1.25968	1.30112	1.30541	1.28565	0.455556	0.505556	0.433333	0.844444	0.5	0.55	0.477778	0.888889
2	1.09878	1.27927	1.2748	1.63131	1.5303	1.49285	1.35954	1.46392	1.48711	1.08889	0.95	1	1.37778	1.06667	0.927778	0.977778	1.35556
4	1.34878	1.28455	1.49228	1.55808	1.82323	1.72306	1.72036	1.49742	1.68686	1.36111	1.35556	1.14444	1.36667	1.38333	1.37778	1.16667	1.38889
GTP (mM)
0	0.00761649	0.00448029	-0.00448029	-0.013285	-0.00201288	-0.00201288	0.0194301	0.0224525	0.0185665	0.0611111	-0.00555556	-0.0666667	-0.0444444	0.138889	0.0722222	0.0111111	0.0333333
0.125	0.0380824	0.0506272	0.0264337	0.105072	0.0523349	0.0442834	0.0241796	-0.00474957	0.0323834	0.0944444	0.0611111	0.0722222	0.0666667	0.1	0.0666667	0.0777778	0.0722222
0.25	0.147401	0.160842	0.147401	0.154992	0.171095	0.18277	0.0984456	0.1019	0.0885147	0.0777778	0.0555556	0.161111	0.0166667	0.05	0.0277778	0.133333	-0.0111111
0.5	0.292115	0.259409	0.287634	0.219002	0.30314	0.240741	0.216321	0.199914	0.21848	-0.283333	-0.261111	-0.2	-0.0888889	0.0833333	0.105556	0.166667	0.277778
1	0.533602	0.523297	0.53853	0.418277	0.397746	0.433172	0.252159	0.370898	0.362694	0.383333	0.372222	0.372222	0.377778	0.0833333	0.0722222	0.0722222	0.0777778
2	0.702061	0.769265	0.671595	0.569243	0.557166	0.575684	0.477547	0.544473	0.412349	0.538889	0.433333	0.483333	0.522222	0.611111	0.505556	0.555556	0.594444
4	0.935484	0.982527	0.965502	0.670692	0.873591	0.849436	0.537997	0.605354	0.668826	0.311111	0.422222	0.316667	0.288889	0.644444	0.755556	0.65	0.622222

## Sheet: NKxR SxE
ATP (mM)
0	0.105556	0.0833333	0.0944444	0.0222222	0.116667	0.0944444	0.105556	0.0333333	-0.216667	-0.205556	-0.255556	-0.322222	-0.0722222	-0.0611111	-0.111111	-0.177778	0.00548794	-0.101661	-0.303094
0.125	1.64444	1.36111	1.35	1.62778	1.63333	1.35	1.33889	1.61667	1.48889	1.52778	1.50556	1.25556	1.58889	1.62778	1.60556	1.35556	1.0611	1.52513	1.16017
0.25	2.49444	2.63889	2.75556	2.52778	2.51667	2.66111	2.77778	2.55	2.34444	2.51111	2.35	2.25	2.50556	2.67222	2.51111	2.41111	2.68941	3.10288	2.74009
0.5	4.57778	4.6	4.7	4.26111	4.68333	4.70556	4.80556	4.36667	3.11111	3.5	3.32222	3.63333	3.27778	3.66667	3.48889	3.8	5.09357	4.45208	6.29767
1	6.81111	6.36667	5.89444	6.73333	6.85	6.40556	5.93333	6.77222	4.61111	4.89444	5.25	5.2	4.83333	5.11667	5.47222	5.42222	8.79261	8.37856	9.14956
2	9.25	9.25556	9.72778	9.65556	9.21667	9.22222	9.69444	9.62222	8.32222	8.41111	8.18333	8.56111	8.30556	8.39444	8.16667	8.54444	12.7296	13.4527	13.0183
4	11.0889	10.6889	9.98333	10.8778	11.2722	10.8722	10.1667	11.0611	8.53889	10.2944	10.2889	9.97222	8.46111	10.2167	10.2111	9.89444	13.9532	16.6378	15.9841
GTP (mM)
0	0.0666667	-0.0111111	-0.0222222	0.0388889	0.0333333	-0.0444444	-0.0555556	0.00555556	-0.327778	-0.355556	-0.377778	-0.344444	-0.172222	-0.2	-0.222222	-0.188889	-0.151139	-0.12555	0.0588896
0.125	0.266667	0.283333	0.411111	0.266667	0.216667	0.233333	0.361111	0.216667	-0.188889	-0.233333	-0.205556	-0.111111	-0.15	-0.194444	-0.166667	-0.0722222	0.826294	0.651014	0.305981
0.25	0.722222	0.8	0.844444	0.777778	0.694444	0.772222	0.816667	0.75	0.15	0.177778	0.338889	0.288889	0.216667	0.244444	0.405556	0.355556	1.39757	1.75739	1.51634
0.5	1.78889	1.79444	1.62778	1.63889	1.79444	1.8	1.63333	1.64444	1.28889	0.933333	0.888889	0.772222	1.29444	0.938889	0.894444	0.777778	2.63752	2.68426	2.74743
1	3.48333	3.27222	3.30556	3.31111	3.45	3.23889	3.27222	3.27778	1.62222	2.18333	1.86111	1.39444	1.98333	2.54444	2.22222	1.75556	4.81297	4.71534	4.37175
2	5.2	5.11667	4.92778	5.12778	5.54444	5.46111	5.27222	5.47222	2.91111	3.45556	4.06667	4.19444	3.36667	3.91111	4.52222	4.65	6.60388	6.95789	6.41793
4	6.28889	6.16111	6.37222	6.53889	6.47222	6.34444	6.55556	6.72222	4.87222	5.38889	4.27222	5.59444	4.62778	5.14444	4.02778	5.35	8.70529	8.91102	7.91518

## Sheet: NKxD SxE
ATP (mM)
0	0.0444444	-0.0388889	-0.0611111	-0.0555556	-0.0833333	-0.111111	-0.0777778	-0.144444	0.0111111	-0.0166667	0.172222	0.0277778	0.162481	0.0340652	-0.0457045
0.125	1.96667	1.16111	0.994444	1	1.54444	1.43889	1.3	1.25	1.15556	1.22222	1.50556	1.02222	2.49208	2.12202	2.24493
0.25	1.95556	1.95556	1.88889	1.93889	2.45	1.94444	2.18333	2.21111	2.29444	2.28333	2.25	2.33889	3.47453	4.01175	4.26955
0.5	3.68333	3.40556	3.35	4.01111	3.84444	4.41111	4.05	3.53333	2.98889	4.43333	3.03333	3.00556	5.7381	5.99976	5.29151
1	4.79444	5.07222	5.06667	5.21111	5.35556	6.1	5.95	5.39444	4.35556	4.76667	4.75	4.43889	7.83158	7.83492	8.14379
2	7.96667	8.07222	7.77222	7.37778	8.01111	7.90556	8.21667	8.07778	7.36111	6.75556	6.78889	6.75	11.0501	11.4993	11.0635
4	9.20556	8.92222	10.1778	9.78333	8.68333	9.3	10.0889	9.23889	8.29444	7.97778	8.72222	8.75	13.8464	14.9555	14.4445
GTP (mM)
0	-0.0111111	0.0444444	-0.0333333	-0.0277778	0.0944444	0.122222	0.00555556	0.0277778	0.0277778	0.0722222	0.0555556	0.0333333	-0.0115141	-0.0287853	0.0345423
0.125	0.283333	0.316667	0.183333	0.272222	0.0944444	0.416667	0.138889	0.0833333	0.0777778	0.0944444	-0.0555556	0.161111	1.22625	1.16292	1.25504
0.25	0.866667	0.955556	0.85	0.838889	0.888889	0.727778	0.888889	0.7	0.505556	0.5	0.594444	0.694444	2.38918	2.43523	2.36615
0.5	2.08889	2.01667	2.11111	2.63889	2.08333	1.92778	1.82778	2.18333	1.38889	1.47222	0.255556	1.36111	3.28728	3.70754	3.61543
1	3.94444	3.6	3.7	3.43889	3.78889	3.98333	3.86111	3.71667	2.59444	2.72778	2.6	2.88889	5.91825	5.5901	5.25619
2	5.64444	5.28333	5.29444	4.8	5.53889	5.86667	6.02778	5.83333	5.01111	4.37222	4.13333	4.12222	6.2061	7.61658	7.1445
4	7.04444	6.88889	7.51667	7.22778	6.58889	7.26111	7.2	7.1	5.08333	5.74444	6.62222	5.92778	8.0023	7.82959	7.28843

## Sheet: NKxD AxA
ATP (mM)
0	0.0444444	0.111111	0.0277778	0.0444444	0.0277778	0.0611111	0.05	-0.0111111	0.05	0.144444	0.111111	0.0388889	0.0777778	0.133333	-0.0388889	-0.0825397	-0.0380952	-1.1746	0.2	0.15	0.111111	0.0111111	0.0611111	-0.0111111
0.125	0.688889	0.644444	0.783333	0.616667	0.805556	0.605556	0.622222	0.55	0.866667	0.905556	1.00556	0.661111	0.255556	0.1	0.0222222	0.571429	0.55873	0.793651	0.244444	0.255556	0.266667	0.327778	0.411111	0.15
0.25	1.08333	1.15	1.08889	1.21111	1.11667	1.17778	1.11667	1.15556	1.18889	1.24444	1.13889	1.18333	0.35	0.183333	0.3	0.615873	0.71746	0.571429	0.277778	0.15	0.222222	0.266667	0.311111	0.183333
0.5	1.83333	1.68889	1.81111	1.71667	1.72778	1.84444	1.86111	1.77222	2.03889	1.81111	1.81111	2.07222	0.511111	0.855556	0.638889	0.146032	1.86667	1.84762	0.0444444	0.594444	0.483333	0.577778	0.711111	0.688889
1	2.68889	2.79444	2.56111	2.35	2.85	2.77778	2.72222	2.61111	2.61111	2.82222	2.80556	2.68333	1.06667	0.966667	0.972222	0.8	2.8127	2.0381	1.23889	1.28889	1.75	1.17778	1.06667	1.10556
2	3.76111	4.17222	3.93889	3.96667	3.77222	3.79444	3.98889	3.82778	4.1	4.22778	4.11111	4.17222	1.95	1.86667	2.02778	3.16825	2.97143	3.39048	1.87778	1.77778	1.95	1.76111	1.62222	1.63889
4	4.82222	5.13333	5.31667	5.36111	4.95	5.17222	5.02778	4.90556	4.95556	4.88333	5.06111	4.91111	3.31111	5.6	4.31667	3.71429	3.54921	2.64762	2.15	2.01667	2.00556	2.15	1.84444	1.75
GTP (mM)
0	0.0277778	0.0888889	0.116667	0.0277778	0.155556	0.0166667	-0.00555556	0.0277778	0	0	0	0.0888889	0.0722222	0.0444444	0.05	0.177778	0.105556	0.0888889	0.0222222	0.1	0.0333333	-0.0222222
0.125	0.133333	0.105556	0.105556	0.0888889	0.0833333	0.0111111	0.00555556	0.116667	0.116667	0.122222	0.188889	0.366667	0.527778	0.561111	0.0777778	0.155556	0.161111	0.0833333	0.172222	0.105556	0.194444	0.1
0.25	0.211111	0.416667	0.466667	0.255556	0.261111	0.238889	0.261111	0.316667	0.25	0.333333	0.155556	0.572222	0.683333	0.716667	0.0555556	0.0611111	0.111111	0.116667	0.0555556	0.0777778	0.0388889	0.0555556
0.5	0.611111	1	0.95	0.777778	0.794444	0.983333	1.05556	0.888889	1.01667	1.13333	1.31667	0.633333	0.655556	0.855556	0.583333	0.722222	0.5	0.488889	0.272222	0.322222	0.5	0.533333
1	1.19444	1.87778	1.82222	1.73333	1.74444	1.77222	1.81111	1.86111	1.72778	1.81667	1.67778	1.62222	1.71667	1.68889	0.9	0.916667	0.955556	0.838889	0.688889	0.822222	0.75	0.761111
2	1.83889	2.87778	2.9	2.86111	2.8	2.82778	2.87778	2.71667	2.47222	2.65556	2.53889	2.22222	1.63333	1.85556	1.27222	1.3	1.42778	1.22222	1.02222	1.20556	1.22222	1.22778
4	1.67222	2.2	2.27778	2.88889	2.92778	3.18889	3.26111	2.86111	3.07222	2.90556	3.34444	2.25	2.71667	2.32778	1.57222	1.32222	1.4	1.45	1.52222	1.20556	1.16667	1.26111

## Sheet: NSxR AxA
ATP (mM)
0	0.0722222	0.0888889	0.05	0.0611111	0.0111111	0.0833333	0.0333333	0	0.111111	0.0555556	0.05	-0.0611111	0.0611111	0.122222	0.0666667	0.00555556
0.125	0.411111	0.227778	0.144444	0.105556	0.166667	0.211111	0.116667	0.116667	0.183333	0.133333	0.0666667	0	0.0611111	0.238889	0.288889	0.205556
0.25	0.238889	0.288889	0.294444	0.294444	0.266667	0.333333	0.255556	0.2	0.172222	0.205556	0.15	0.205556	0.4	0.305556	0.322222	0.311111
0.5	0.566667	0.561111	0.588889	0.483333	0.6	0.7	0.572222	0.522222	0.594444	0.5	0.583333	0.494444	0.988889	1.04444	1.00556	1.03889
1	0.966667	1.01111	0.961111	0.9	1.17222	1.08889	1.03889	1.09444	1.11667	1.07222	0.966667	0.822222	2.13333	2.13889	2.21667	1.82222
2	1.85556	1.60556	1.83889	1.65556	1.74444	1.8	1.85	1.95556	1.30556	1.68889	1.59444	1.56111	3.12222	3.11667	3.08889	3.31667
4	2.69444	2.50556	2.8	2.51667	2.53889	2.55	2.50556	2.51111	2.24444	2.05556	2	2.09444	3.36111	3.4	3.38333	3.6
GTP (mM)
0	0.0888889	0.155556	0.0888889	0.0944444	0.0166667	0.0555556	0.0277778	-0.0111111	0.0222222	0.133333	0.188889	0.15
0.125	0.116667	0.122222	0.0666667	0.0722222	0.0888889	0.0944444	0.0333333	0.0388889	-0.0333333	0.0333333	-0.0111111	-0.0666667
0.25	0.111111	0.377778	0.183333	0.227778	0.111111	0.377778	0.183333	0.227778	0.127778	0.0166667	0.0444444	0.0722222
0.5	0.538889	0.3	0.288889	0.433333	0.361111	0.972222	0.422222	0.538889	0.722222	0.577778	0.466667	0.572222
1	0.944444	0.916667	0.872222	0.838889	0.822222	0.888889	0.688889	0.683333	1.38333	1.48333	1.18889	1.36667
2	1.26111	1.26111	1.47222	1.31111	1.18889	1.16667	1.21667	1.23333	2.07778	2.24444	2.24444	2.45
4	1.45	1.65556	1.37222	1.16111	1.5	1.75556	1.82222	1.67778	2.3	3.1	2.56667	2.49444

## Sheet: NSxR AxE
ATP (mM)
0	0.111111	0.15	0.105556	0.0722222	0.0166667	0.0666667	0.0166667	0.0277778	-0.00555556	0.0944444	0.122222	0.0888889
0.125	0.244444	0.294444	0.238889	0.194444	0.277778	0.377778	0.188889	0.177778	0.0277778	0.05	0.0611111	-0.00555556
0.25	0.372222	0.344444	0.216667	0.305556	0.305556	0.361111	0.322222	0.294444	0.111111	0.127778	0.177778	0.216667
0.5	0.627778	0.588889	0.533333	0.505556	0.661111	0.683333	0.755556	0.661111	0.361111	0.433333	0.0222222	0.5
1	1.22778	1.06667	1.07778	1.08333	1.11667	1.16667	1.12778	1.08889	0.894444	0.661111	1.05556	0.883333
2	1.98333	1.9	1.95556	1.82778	1.96111	1.73333	1.75556	1.71667	1.78333	2.02222	2.12778	2.39444
4	2.67778	2.65	2.63333	2.37222	2.31667	2.22778	2.36667	2.41111	1.69444	2.10023	2.03333	2.36111
GTP (mM)
0	0.0833333	0.0833333	0.0888889	0.0833333	-0.00555556	0.0666667	-0.00555556	-0.0222222	0.0111111	0.0555556	0.0166667	0.0111111	-0.265432	-0.12963	-0.148148	-0.154321	0.0883838	0.145202
0.125	0.0888889	0.09	0.0944444	0.0888889	0.105556	0.0944444	0.0444444	0.0888889	0.0333333	0.138889	0.0388889	0.116667	-0.117284	-0.154321	-0.135802	0.0802469	0.113636	0.0315657
0.25	0.1	0.122222	0.172222	0.116667	0.0944444	0.1	0.0611111	0.1	-0.261111	-0.261111	-0.305556	-0.272222	0.364198	0.037037	-0.0493827	0.401235	0.334596	0.429293
0.5	0.388889	0.416667	0.333333	0.294444	0.355556	0.366667	0.372222	0.366667	0.477778	0.25	0.188889	0.0611111	0.580247	1.04321	1.05556	0.407407	0.965909	1.27525
1	0.844444	0.694444	0.516667	0.666667	0.677778	0.777778	0.811111	0.733333	0.327778	0.433333	0.372222	0.316667	0.864198	1.20988	1.30864	0.58642	1.80556	1.88763
2	1.49444	1.42222	1.55	1.36111	1.4	1.45	1.33333	1.53889	1.36111	1.31667	1.63889	1.55556	2.74691	0.530864	2.67284	2.95679	2.02652	1.35101
4	1.43889	1.50556	1.41667	1.42778	1.49444	1.50556	1.53889	1.86667	0.922222	0.911111	1.53333	1.99444	0.290123	0.32716	0.41358	1.16667	1.13636	1.5404

## Sheet: NSxR SxA
ATP (mM)
0	0.0888889	0.111111	0.233333	0.105556	0.116667	0.138889	0.261111	0.133333	-0.0944444	-0.0111111	0.0388889	-0.0333333	0.135802	0.104938	0.0123457	0.148148	0
0.125	0.0333333	0.05	0.111111	0.0888889	0.155556	0.172222	0.233333	0.211111	0.1	0.122222	0.211111	0.0777778	0.450617	0.333333	0.376543	0.481481	0.611111
0.25	0.2	0.211111	0.205556	0.216667	0.311111	0.322222	0.316667	0.327778	0.266667	1.03889	0.333333	0.0277778	0.512346	0.58642	0.561728	0.691358	0.839506
0.5	0.294444	0.377778	0.411111	0.527778	0.261111	0.344444	0.377778	0.494444	0.6	0.111111	0.827778	0.738889	0.975309	1.04321	0.91358	1.46296	1.2963
1	0.711111	0.538889	0.633333	0.627778	0.755556	0.583333	0.677778	0.672222	0.95	1.06111	1.05	0.994444	1.81481	1.80247	1.80247	1.64815	1.95679
2	1.15	1.36667	1.37778	1.26667	1.17778	1.39444	1.40556	1.29444	1.69444	2.05	2.08333	2.03333	2.72222	2.49383	2.49383	3.05556	2.96914
4	1.77778	1.65556	1.43333	1.56111	1.80556	1.68333	1.46111	1.58889	2.83889	2.74444	2.83889	1.9	2.95062	2.97531	3.01235	3.08025	2.85185
GTP (mM)
0	0.0388889	0.0444444	0.0444444	-0.0277778	0.0333333	0.0388889	0.0388889	-0.0333333	-0.0388889	0.0833333	0.138889	0.0722222	0.0555556	0.0617284	0.0679012	0.0617284	0.0555556	-0.148148	-0.154321
0.125	0.111111	0.0444444	0.533333	0.00555556	-0.0777778	-0.144444	0.344444	-0.183333	-0.222222	-0.0666667	-0.144444	-0.2	-0.0740741	0.0740741	-0.0308642	-0.104938	0.0246914	-0.135802	0.0802469
0.25	0.0722222	0.0166667	0.0111111	0.0388889	0.111111	0.0555556	0.05	0.0777778	0.127778	0.227778	0.5	0.288889	0.32716	0.271605	0.320988	0.296296	0.246914	-0.0493827	0.401235
0.5	0.2	0.261111	0.183333	0.316667	0.211111	0.272222	0.194444	0.327778	0.261111	0.361111	0.433333	0.25	0.450617	0.339506	0.425926	0.395062	1.14815	1.05556	0.407407
1	0.477778	0.522222	0.655556	0.65	0.244444	0.288889	0.422222	0.416667	0.716667	0.605556	0.583333	0.8	1.48148	1.40741	0.950617	0.919753	1.48148	1.30864	0.58642
2	0.805556	0.833333	0.705556	0.844444	0.894444	0.922222	0.794444	0.933333	0.816667	1.28889	1.77222	1.43333	1.15432	1.60494	1.79012	1.20988	2.56173	2.67284	2.95679
4	1.11111	1.11667	1.04444	1.17222	0.944444	0.95	0.877778	1.00556	1.62778	1.81667	1.86111	1	2.24691	1.58642	2.25309	1.80247	2.71605	0.41358	1.16667

## Sheet: NSxD SxA (GTPase)
ATP (mM)
0	0.227273	0.189394	0.0631313	0.0564859	0.0365497	-0.0299043	-0.0199362	-0.0598086	0.0166135	-0.0099681	-0.0598086	0	0.0365497	0.0299043	0.0132908	-0.0365497	-0.0365497
0.125	0.094697	0.164141	0.0505051	0.0299043	0.066454	0.0066454	-0.0033227	0	0	-0.0166135	-0.0033227	0.0531632	0.0199362	0.033227	0.0631313	0.0199362	0.0132908
0.25	-0.0505051	0	0.0378788	0.0166135	0.0431951	0.0631313	0.0199362	0.0498405	0.0598086	0.0365497	0.0265816	-0.0033227	-0.0099681	0.0564859	0.0631313	0.0697767	0.0299043
0.5	0.271465	0.170455	0.580808	0.0199362	-0.033227	0.182749	-0.033227	0.0498405	0.0797448	0.0897129	0.0963583	0.126263	0.146199	0.0697767	0.0963583	0.103004	0.156167
1	0.42298	0.492424	0.448232	0.146199	0.182749	0.15949	0.265816	0.149522	0.066454	0.0897129	0.136231	0.0897129	0.0897129	0.289075	0.305688	0.20933	0.312334
2	0.700758	0.315657	0.606061	0.488437	0.285752	0.438596	0.707735	0.269139	0.388756	0.358852	0.325625	0.448565	0.49176	0.505051	0.618022	0.524987	0.481792
4	0.681818	0.467172	0.833333	0.588118	0.475146	0.667863	0.641281	0.259171	0.219298	0.299043	0.345561	0.501728	0.45521	0.624668	0.6147	0.62799	0.604732
GTP (mM)
0	0.0820707	0.0568182	-0.00631313	0.132576	0.107323	0.0441919	0.107323	0.094697	0.0757576	0.0126263	0.157828	0.151515	0.0694444	0.119949	-0.0568182	-0.0315657	-0.0568182	-0.164141
0.125	0.094697	0.107323	0.0820707	0.119949	0.132576	0.107323	0.189394	0.10101	0.0757576	0.107323	0.0883838	0.208333	0.119949	0.126263	0.132576	0.113636	0.0505051	0.0189394
0.25	0.0820707	0.094697	0.0126263	-0.0315657	-0.0189394	-0.10101	-0.0126263	0.0568182	0.0315657	0.00631313	0.0820707	0.132576	0.0694444	0.00631313	0.0631313	0.0568182	0.0252525	0.0252525
0.5	-0.094697	-0.0568182	-0.0757576	0.0378788	0.0757576	0.0568182	0.22096	0.094697	0.0378788	0.0820707	0.10101	0.094697	0.0441919	0.0441919	0.094697	0.113636	-0.0378788	0.0126263
1	0.22096	0.252525	0.10101	0.195707	0.227273	0.0757576	0.151515	0.126263	0.10101	0.0820707	0.277778	0.347222	0.227273	0.208333	0.42298	0.227273	0.20202	0.473485
2	0.599747	0.656566	0.625	0.625	0.681818	0.650253	0.542929	0.915404	0.858586	0.694444	0.770202	0.763889	0.757576	0.82702	0.694444	0.606061	0.536616	0.580808
4	0.30303	0.612374	0.296717	0.568182	0.877525	0.561869	0.934343	0.713384	0.574495	0.877525	0.359848	0.284091	0.441919	1.07323	1.07955	0.934343	0.650253	0.782828

## Sheet: Era (wt)
ATP (mM)
0	0.0284091	0.0416667	-0.0132576	-0.032197	-0.0397727	0	0.00757576	0.0530303	0.0643939	0.0416667	0.0549242	0	0.0284091	0.0416667	-0.0132576	0.0416667	0.0530303	0.0643939	0.0284091	0.0416667
0.125	0.00568182	0.0871212	-0.0170455	0.0473485	0.0397727	-0.0094697	0.0284091	0.0151515	0.0606061	0	0.0814394	-0.0227273	0.00568182	0.0871212	-0.0170455	0.0871212	0.0151515	0.0606061	0.00568182	0.0871212
0.25	-0.00189394	-0.00757576	-0.032197	-0.0359848	-0.0397727	0.0113636	0.0416667	0.030303	0.0208333	-0.00568182	-0.0113636	-0.0359848	-0.00189394	-0.00757576	-0.032197	-0.00757576	0.030303	0.0208333	-0.00189394	-0.00757576
0.5	0.0265152	0.0530303	0.0397727	-0.032197	-0.0890152	0.0094697	0.0625	0.0625	0.0397727	0.0227273	0.0492424	0.0359848	0.0265152	0.0530303	0.0397727	0.0530303	0.0625	0.0397727	0.0265152	0.0530303
1	0.00378788	-0.0113636	-0.00757576	0.00568182	0.00568182	0.0473485	0.00757576	0.00568182	0.00378788	0.0170455	0.00189394	0.00568182	0.00378788	-0.0113636	-0.00757576	-0.0113636	0.00568182	0.00378788	0.00378788	-0.0113636
2	0.00757576	0.0227273	0.0132576	0.0625	0.0170455	0.00568182	0.0587121	0.0511364	0.0113636	0.032197	0.0473485	0.0378788	0.00757576	0.0227273	0.0132576	0.0227273	0.0511364	0.0113636	0.00757576	0.0227273
4	0.106061	0.143939	0.117424	0.0757576	0.113636	0.111742	0.092803	0.0719697	0.0700758	0.106061	0.143939	0.117424	0.106061	0.143939	0.117424	0.143939	0.0719697	0.0700758	0.106061	0.143939
GTP (mM)
0	0.0397727	0.0246212	-0.00189394	-0.0189394	-0.0265152	0.0631313	0.0662879	0.0719697	0.0814394	0.032197	0.0170455	-0.0094697	0.0662879	0.0719697	0.0814394	0.0397727	-0.00189394	-0.0265152
0.125	0.0397727	0.0473485	0.0435606	-0.0113636	-0.030303	-0.0252525	-0.0284091	-0.0246212	-0.0208333	0.0511364	0.0587121	0.0549242	-0.0284091	-0.0246212	-0.0208333	0.0397727	0.0435606	-0.030303
0.25	0.00757576	-0.0094697	-0.0151515	0.0397727	0.0113636	0.0252525	0.00757576	0.0284091	-0.00757576	-0.0189394	-0.0359848	-0.0416667	0.00757576	0.0284091	-0.00757576	0.00757576	-0.0151515	0.0113636
0.5	0.0378788	0.0265152	0.0132576	0.00189394	0.0132576	0.10101	-0.0132576	0.0473485	0.00189394	0.0587121	0.0473485	0.0340909	-0.0132576	0.0473485	0.00189394	0.0378788	0.0132576	0.0132576
1	0.0132576	0.0587121	0.0189394	0.0606061	0.0416667	0.20202	0.094697	0.142045	0.0397727	0.0227273	0.0681818	0.0284091	0.094697	0.142045	0.0397727	0.0132576	0.0189394	0.0416667
2	0.123106	0.138258	0.111742	0.3125	0.0776515	0.309343	0.0965909	0.0890152	0.113636	0.100379	0.11553	0.0890152	0.0965909	0.0890152	0.113636	0.123106	0.111742	0.0776515
4	0.032197	0.0132576	0.0416667	0.111742	0.0549242	0.133333	0.0492424	0.0568182	0.13447	0.032197	0.0132576	0.0416667	0.0492424	0.0568182	0.13447	0.032197	0.0416667	0.0549242

[truncated: 3 more sheets: Era (NSxR SxE), SpoIVA ATP-g-s ADP, SpoIVA GTP-g-s GDP]
