# Supplementary material for: Reformulation of an extant ATPase active site to mimic ancestral GTPase activity reveals a nucleotide base requirement for function
Source: eLife. 2021 Mar 11;10:e65845. doi: 10.7554/eLife.65845 (PMC7952092; doi:10.7554/eLife.65845)
Supplement: Source data 1. — For Figures 2, 4, and 5. [file elife-65845-data1.xlsx]

## Sheet: Km 
	NSxR SxE (wt)	NSxD SxE	NKxR SxE	NKxD SxE	NKxD AxA	NSxR AxA	NSxR AxE	NSxR SxA	NSxD SxA (res)	Era (wt)	Era NSxR SxE (res)
Km +ATP	0.45	0.595	0.88	1.38	1.45	3.83	2.581	2.815	5.022	Ambigous	0.09882
	0.73	0.508	1.31	1.02	1.16	2.8	1.24	3.952	4.338	Ambigous	1.4
	0.5	0.481	1.03	1.06	1.54	1.73	3.17	3.265	3.109	Ambigous	2.43
	0.53			1.13	1.33	3	1.29	8.16	4.55	Ambigous	0.1114
	0.62				0.75	1.32	1.27	4.316	4.213		2.61
	0.48				1.86			2.451	2.288		0.1602
	0.47				1.96			1.51			0.3001
	0.31				1.77						2.055
											1.363
Ave	0.51125	0.528	1.07333	1.15333	1.38333	2.78667	2.33033	3.344	3.92	N.D.	1.16984
StDev	0.123686	0.0595735	0.218251	0.161529	0.400205	1.01091	0.905641	2.14542	1.01912	N.D.	1.03556
Km +GTP	NSxR SxE (wt)	NSxD SxE	NKxR SxE	NKxD SxE	NKxD AxA	NSxR AxA	NSxR AxE	NSxR SxA	NSxD SxA (res)	Era (wt)	Era NSxR SxE (res)
	0.67	1.927	1.7	2.17	1.55	1.85	2.43	2.884	2.49	1.826	Ambigous
	0.81	1.73	3.02	2.03	1.67	2.19	8.79	1.122	2.923	1.037	Ambigous
	1.09	1.703	2.1	3.3	1.57	3.72	0.57	7.372	1.718	1.298	Ambigous
	0.92			2.1	2.22	2.82	0.51	3.177	1.452	0.637	Ambigous
	1.03				2.6		3.014	2.405	3.641	0.487	Ambigous
	1.6				0.81			2.035	5.646
	1.07				0.55			2.215
					3.17			2.9
					2.7
Ave	1.02714	1.78667	2.27333	2.4	1.56714	2.645	3.0628	3.03	2.97833	1.057	N.D.
StDev	0.294432	0.12228	0.676855	0.602716	0.875549	0.821645	3.38875	1.87449	1.5307	0.536456	N.D.

## Sheet: Kcat
	NSxR SxE (wt)	NSxD SxE	NKxR SxE	NKxD SxE	NKxD AxA	NSxR AxA	NSxR AxE	NSxR SxA	NSxD SxA (res)	Era (wt)	Era NSxR SxE (res)
Kcat +ATP	2.887	1.583	13.85	12.84	6.846	5.075	4.088	2.835	2.249	Ambigous	0.0493
	3.13	1.916	13.08	11.84	6.39	3.607	6	3.986	2.914	Ambigous	0.029
	1.759	1.831	13.74	11	2.89	7.003	4.17	4.78	1.27	Ambigous	0.094
	2.365			10.71	7.515	6.656	6.216	7.8	1.9677	Ambigous	0.0361
	2.342				2.634	8.529	6.904	4.9	1.99		0.114
	1.616				5.33			5.5651	0.9864		0.02505
	1.649				10.9			4.297			0.08643
	1.367				7.712						0.2234
											0.1339
Ave	2.13938	1.77667	13.5567	11.5975	6.27712	6.174	5.4756	4.88044	1.89618	N.D.	0.0879089
StDev	0.642304	0.173021	0.416453	0.956953	2.69763	1.88831	1.27412	1.54528	0.691977	N.D.	0.0603594
	NSxR SxE (wt)	NSxD SxE	NKxR SxE	NKxD SxE	NKxD AxA	NSxR AxA	NSxR AxE	NSxR SxA	NSxD SxA (res)	Era (wt)	Era NSxR SxE (res)
Kcat +GTP	1.65	1.427	12.22	11.08	4.308	2.318	2.63	1.836	1.195	0.2691	Ambigous
	1.718	1.12	10.23	10.96	4.48	6.481	4.7	1.554	1.534	0.204	Ambigous
	0.49	0.8711	10.26	10.92	2.004	5.4	4.564	1.235	0.9279	0.1323	Ambigous
	1.467				1.723	8.839	1.533	6.5	1.645	0.078	Ambigous
	0.9057				5.174		2.252	3.56	1.178	0.0686	Ambigous
	1.091				1.09			1.92	2.235
	0.7892				1.5			3.067
					7.618			3.098
					8.505
Ave	1.1587	1.13937	10.9033	10.9867	4.04467	5.7595	3.1358	2.84625	1.45248	0.1504	N.D.
StDev	0.465747	0.278456	1.14037	0.0832666	2.71471	2.7066	1.42236	1.6952	0.463221	0.0854741	N.D.

## Sheet: Cat.Eff.
	NSxR SxE (wt)	NSxD SxE	NKxR SxE	NKxD SxE	NKxD AxA	NSxR AxA	NSxR AxE	NSxR SxA	NSxD SxA (res)	Era (wt)	Era NSxR SxE (res)
Cat.Eff. +ATP	6.41556	2.6605	15.74	9.32462	4.70839	1.32645	1.58388	1.0071	0.44783	Ambigous	0.498887
	4.29	3.7724	9.98	11.6078	5.50862	1.28924	4.84653	1.0086	0.524803	Ambigous	0.0207143
	3.518	3.80665	13.34	10.3774	1.87662	4.05032	1.31546	1.46401	0.432462	Ambigous	0.0386831
	4.49107			9.49468	5.6717	2.22015	4.83359	0.955882	0.408491	Ambigous	0.324057
	3.7762				3.512	6.46	5.44909	1.13531	0.472347		0.0436782
	3.39353				2.87177			2.30559	0.431119		0.156367
	3.48184				5.56122			2.85136			0.288004
	4.39267				4.35706			0.511492			0.10871
											0.0982392
Ave	4.21986	3.41318	13.02	10.2011	4.25842	3.06923	3.60571	1.40492	0.452842	N.D.	0.17526
StDev	0.988964	0.652065	2.8933	1.04518	1.39503	2.2015	1.9861	0.783285	0.0410809	N.D.	0.162079
	NSxR SxE (wt)	NSxD SxE	NKxR SxE	NKxD SxE	NKxD AxA	NSxR AxA	NSxR AxE	NSxR SxA	NSxD SxA (res)	Era (wt)	Era NSxR SxE (res)
Cat.Eff. +GTP	2.50379	0.740529	7.188	5.10364	2.77935	1.25297	1.08186	0.535862	0.47992	0.895604	Ambigous
	2.12099	0.646651	3.387	5.39902	2.68263	2.96478	1.55939	1.10071	0.671738	0.610275	Ambigous
	0.5	0.511509	6.35	3.31311	1.27725	1.45005	2.68194	0.881356	0.540105	0.612811	Ambigous
	1.59961				3.14302	3.1344	4.40791	1.12055	1.13292	1.01104	Ambigous
	0.882749				1.99077			0.798337	0.323537	0.405264	Ambigous
	0.659613				1.34071			1.50713
	0.747348				2.75229			1.39865
					2.40315
Ave	1.28773	0.632897	5.64167	4.60525	2.29615	2.20055	2.43278	1.04894	0.629644	0.706998	N.D.
StDev	0.78967	0.115128	1.99705	1.12874	0.693216	0.986113	1.47772	0.34014	0.307894	0.243557	N.D.

## Sheet: Cat.Eff. Ratio
	NSxR SxE (wt)	NSxD SxE	NKxR SxE	NKxD SxE	NKxD AxA	NSxR AxA	NSxR AxE	NSxR SxA	NSxD SxA (res)	Era (wt)	Era NSxR SxE (res)
Cat.Eff. +ATP/+GTP	2.56233	3.59271	2.189	1.82705	1.69406	1.05864	1.46404	1.58197	0.933134
	2.02264	5.83374	2.9465	2.14999	2.05344	1.02894	3.10796	0.916318	0.781262
	3.8	7.442	2.10079	1.92208	1.46927	1.36615	2.53349	1.66109	0.416929
	2.80761			2.86579	2.42011	1.53108	1.80227	0.853044	0.756319
	2.3607			2.15624	2.849	2.06144	1.23621	1.4221	1.09247
	3.84428			1.84389	2.6195			1.52979
	5.27861			2.19448	1.04341			2.03866
	5.87768				2.31414
					1.38627
Ave	3.56923	5.62282	2.4121	2.13708	1.98324	1.40925	2.02879	1.429	0.796023	N.D.	N.D.
StDev	1.40541	1.9333	0.464905	0.35664	0.614837	0.421191	0.777462	0.419071	0.251092	N.D.	N.D.

## Sheet: Prot.
	NSxR SxE (wt)	NSxD SxE	NKxR SxE	NKxD SxE	NKxD AxA	NSxR AxA	NSxR AxE	NSxR SxA	NSxD SxA (res)
Prot.+ATP	0.26	0.24	1.13	0.96	1.07	0.59	0.55	0.57	0.44
	0.22	0.26	0.9	0.92	0.83	0.55	0.48	0.45	0.57
	0.17		1.05	1.04	1.14	0.52	0.28	0.56	0.23
								0.52	0.17
Ave	0.216667	0.25	1.02667	0.973333	1.01333	0.553333	0.436667	0.525	0.3525
St.Dev	0.0450925	0.0141421	0.116762	0.061101	0.162583	0.0351188	0.140119	0.0282843	0.18554
Prot. +GTP	NSxR SxE (wt)	NSxD SxE	NKxR SxE	NKxD SxE	NKxD AxA	NSxR AxA	NSxR AxE	NSxR SxA	NSxD SxA (res)
	0.24	0.31	1.1	1.09	1.11	0.65	0.52	0.47	0.48
	0.2	0.36	0.9	1.01	1.21	0.51	0.42	0.56	0.68
	0.37		1.3	0.86	0.99	0.61	0.48	0.6	0.2
						0.57		0.46	0.24
Ave	0.27	0.335	1.1	0.986667	1.10333	0.585	0.473333	0.5225	0.4
St.Dev	0.0888819	0.0353553	0.2	0.116762	0.110151	0.0597216	0.0503322	0.0684957	0.223905

## Sheet: Polym.
	NSxR SxE (wt)	NSxD SxE	NKxR SxE	NKxD SxE	NKxD AxA	NSxR AxA	NSxR AxE	NSxR SxA	NSxD SxA (res)
Polym.+ATP	63.92	6.43	0.755	0.66	0.7489	10.288	18.249	9.42	25.2
	15.38	14.47	0.715	0.77	0.5918	10.957	16.408	6.9	6.85
	24.08	66.77	0.594	3.787	1.319	4.954		7.99	8.27
	31.01	22.9						5.14	14.51
	30.99	27.3
	32.44	21.6
Ave	32.97	26.5783	0.688	1.739	0.886567	8.733	17.3285	7.3625	13.7075
StDev	16.4583	21.0084	0.0838272	1.77447	0.382647	3.28976	1.30178	1.80559	8.35291
Polym. +GTP	NSxR SxE (wt)	NSxD SxE	NKxR SxE	NKxD SxE	NKxD AxA	NSxR AxA	NSxR AxE	NSxR SxA	NSxD SxA (res)	Era
	9.437	0.65	0.637	0.825	0.783	1.89	1.804	1.52	2.6
	2.307	0.76	0.679	0.836	0.5797	0.577	0.486	3.88	0.69
	7.365	0.73	0.69	1.638	1.255	1.47		1.69	1.78
	5.753	1.53			0.85			1.432	0.9
	3.955
	8.61
Ave	6.23783	0.9175	0.668667	1.09967	0.866925	1.31233	1.145	2.1305	1.4925
StDev	2.7579	0.410964	0.0279702	0.466243	0.283096	0.670549	0.931967	1.17124	0.876408
