# Supplementary material for: Reformulation of an extant ATPase active site to mimic ancestral GTPase activity reveals a nucleotide base requirement for function
Source: eLife. 2021 Mar 11;10:e65845. doi: 10.7554/eLife.65845 (PMC7952092; doi:10.7554/eLife.65845)
Supplement: Supplementary file 3. — 0 hr time point indicates time of sporulation induction by resuspension; pre-induction is immediately prior to resuspension. Errors are S.D. [file elife-65845-supp3.docx]

**Supplementary File 3. Nucleotide levels (ion counts) at indicated time points after induction of sporulation in *B. subtilis* via resuspension method. 0 h time point indicates time of sporulation induction by resuspension; pre-induction is immediately prior to resuspension. Errors are S.D.**

**Time post-induction of sporulation (h)**

| Nucleotide | Pre-induction | 0 | 1 | 2 | 3.5 | 5 |
| --- | --- | --- | --- | --- | --- | --- |
| ATP | 1.1×109 ± 4.2×108 | 1.2×109 ± 4.5×108 | 2.2×109 ± 2.1×107 | 1.2×109 ± 5.7×107 | 7.8×108 ± 1.2 ×108 | 3.8×108 ± 4.0×107 |
| ADP | 7.6×108 ± 6.3×107 | 1.5×109 ±  2.9×108 | 1.3×109 ±  2.3×107 | 7.9×108 ±  5.1×107 | 5.4×108 ±  6.5×108 | 4.4×108 ±  6.2×107 |
| AMP | 2.9×108 ±  3.5×107 | 5.2×108 ±  1.1×108 | 6.3×108 ±  1.0×108 | 3.4×108 ±  2.2×107 | 2.7×108 ±  2.9×107 | 2.9×108 ±  1.5×107 |
| GTP | 3.1×108 ±  1.6×108 | 3.4×107 ±  1.6×107 | 4.8×107 ±  7.7×106 | 6.7×107 ±  9.5×106 | 9.6×107 ±  1.6×107 | 7.5×107 ±  5.7×106 |
| GDP | 2.8×108 ±  1.5×108 | 6.1×107 ±  1.8×107 | 4.8×107 ±  7.7×106 | 6.5×107 ±  1.0×107 | 7.4×107 ±  1.2×107 | 8.3×107 ±  3.8×106 |
| GMP | 2.3×107 ±  1.0×107 | 3.1×107 ±  1.3×107 | 7.5×106 ±  1.8×106 | 5.9×106 ±  2.3×106 | 2.5×107 ±  7.2×106 | 8.7×107 ±  1.2×107 |
| CTP | 2.6×108 ±  4.0×107 | 2.8×108 ±  1.0×108 | 4.4×108 ±  1.5×107 | 2.3×108 ±  2.1×107 | 1.6×108 ±  1.0×107 | 1.5×108 ±  1.8×107 |
| CDP | 7.9×107 ±  7.8×106 | 2.2×108 ±  6.4×107 | 2.7×108 ±  3.0×107 | 1.4×108 ±  9.2×106 | 1.0×108 ±  1.2×107 | 1.3×108 ±  1.1×107 |
| CMP | 3.1×107 ±  2.2×106 | 1.0×108 ±  7.5×106 | 5.6×107 ±  3.6×106 | 2.9×107 ±  2.9×106 | 4.6×107 ±  5.6×106 | 1.1×108 ±  2.1×107 |
| UTP | 5.1×108 ±  6.0×107 | 2.0×108 ±  4.9×107 | 4.6×108 ±  1.7×107 | 2.8×108 ±  1.8×107 | 2.3×108 ±  1.7×107 | 1.8×108 ±  1.8×107 |
| UDP | 2.8×108 ±  4.5×107 | 2.8×108 ±  6.2×107 | 4.4×108 ±  3.9×107 | 2.6×108 ±  2.0×107 | 2.1×108 ±  1.9×107 | 2.2×108 ±  1.9×107 |
| UMP | 1.2×108 ±  8.4×107 | 2.9×108 ±  1.6×107 | 1.4×108 ±  6.7×106 | 6.8×107 ±  4.1×106 | 8.9×107 ±  1.8×107 | 1.7×108 ±  3.8×107 |
| ppGpp | 1.9×106 ±  3.3×106 | 5.4×107 ±  4.2×107 | 1.8×107 ±  8.4×106 | 1.2×105 ±  6.6×104 | 2.8×104 ±  4.0×104 | 2.5×104 ±  2.3×104 |
| pGpp | 6.3×106 ±  5.1×106 | 1.1×108 ±  5.9×107 | 4.2×107 ±  1.3×107 | 8.8×106 ±  9.1×105 | 5.1×106 ±  9.7×105 | 4.5×106 ±  7.5×105 |
